# Supplementary material
Source: PubMed Central journal article supplement (PMC10992545)
Supplement: 262_2021_3083_MOESM1_ESM.pdf [file 262_2021_3083_MOESM1_ESM.pdf]

**Supplementary Table 1 Overview of the study treatment (n=84)**

**Supplementary Table 2 Univariate and multivariate analysis for disease control rate**

**Supplementary Table 3 Univariate and multivariate analysis for progression-free survival**

**Supplementary Table 1 Overview of the study treatment (n=84)**

| Characteristics                            | No. (%)        |
|--------------------------------------------|----------------|
| Types of ICIs                              |                |
| Nivolumab                                  | 17 (20)        |
| Pembrolizumab                              | 6 (7)          |
| Sintilimab                                 | 33 (39)        |
| Camrelizumab                               | 12 (14)        |
| Toripalimab                                | 13 (15)        |
| Tislelizumab                               | 3 (4)          |
| Final dose of regorafenib, mg <sup>a</sup> |                |
| 40                                         | 2 (2)          |
| 60                                         | 1 (1)          |
| 80                                         | 64 (76)        |
| 100                                        | 1 (1)          |
| 120                                        | 10 (12)        |
| 160                                        | 6 (7)          |
| Median cycles of ICIs received (range)     | 4 (1-24)       |
| Median treatment duration, months (range)  | 4.3 (0.5-18.8) |
| Treatment status                           |                |
| Ongoing                                    | 15 (18)        |
| Terminated because of progressive disease  | 45 (54)        |
| Terminated because of TRAEs                | 14 (17)        |
| Terminated because of other reasons        | 10 (12)        |

a. The treatment dose was presented as the daily dose of the 21 days on/7 days off schedule. For example, if a patient used regorafenib 40mg /80mg qd alternatively in a 21 days on/7 days off manner, the dose was presented as 60mg.

**Abbreviations:** ICI, immune checkpoint inhibitor; TRAE, treatment-related adverse event

**Supplementary Table 2 Univariate and multivariate analysis for disease control rate <sup>a</sup>**

| <b>Variables</b>                                                        | <b>Univariate analysis OR<br/>(95%CI)</b> | <b>P value for univariate<br/>analysis</b> | <b>Multivariate analysis OR<br/>(95% CI)</b> | <b>P value for multivariate<br/>analysis</b> |
|-------------------------------------------------------------------------|-------------------------------------------|--------------------------------------------|----------------------------------------------|----------------------------------------------|
| Age ( $\geq 70$ vs $< 70$ )                                             | 1.37 (0.46-4.24)                          | 0.58                                       | -                                            | -                                            |
| ECOG PS ( $\geq 1$ vs 0)                                                | 0.59 (0.20-1.61)                          | 0.31                                       | -                                            | -                                            |
| Site of primary tumor (left vs right)                                   | 1.15 (0.41-3.26)                          | 0.79                                       | -                                            | -                                            |
| Synchronous metastases (yes vs no)                                      | 0.78 (0.32-1.89)                          | 0.59                                       | 0.97 (0.35-2.64)                             | 0.95                                         |
| Metastatic sites ( $\geq 4$ vs $< 4$ )                                  | 4.73 (1.09-32.79)                         | 0.06                                       | 3.97 (0.86-28.42)                            | 0.11                                         |
| Lung metastases (yes vs no)                                             | 0.82 (0.34-1.97)                          | 0.66                                       | 0.84 (0.32-2.16)                             | 0.71                                         |
| Liver metastases (yes vs no)                                            | 2.68 (1.06-7.06)                          | 0.04                                       | 3.80 (1.33-11.76)                            | 0.02                                         |
| BRAF, KRAS or NRAS mutation (yes vs no)                                 | 0.78 (0.30-1.98)                          | 0.60                                       | -                                            | -                                            |
| KRAS or NRAS mutation (yes vs no)                                       | 0.98 (0.39-2.48)                          | 0.97                                       | -                                            | -                                            |
| BRAF mutation (yes vs no)                                               | 0.46 (0.02-5.00)                          | 0.53                                       | -                                            | -                                            |
| Previous treatment lines ( $\geq 3$ vs $< 3$ )                          | 1.86 (0.76-4.65)                          | 0.18                                       | 1.64 (0.62-4.39)                             | 0.32                                         |
| Previous regorafenib (yes vs no)                                        | 3.73 (1.33-11.65)                         | 0.02                                       | 3.62 (1.12-13.28)                            | 0.04                                         |
| Previous ICIs (yes vs no)                                               | 0.49 (0.02-5.29)                          | 0.56                                       | 0.56 (0.02-6.31)                             | 0.65                                         |
| Previous anti-VEGF treatment (yes vs no)                                | 1.23 (0.34-4.64)                          | 0.75                                       | 1.21 (0.31-4.80)                             | 0.78                                         |
| Previous anti-EGFR treatment (yes vs no)                                | 0.69 (0.26-1.83)                          | 0.46                                       | 0.57 (0.15-2.02)                             | 0.38                                         |
| Time to study treatment initiation ( $\geq 18$ months vs $< 18$ months) | 1.99 (0.83-4.87)                          | 0.12                                       | 2.40 (0.92-6.50)                             | 0.08                                         |
| Baseline NLR ( $\geq 1.5$ vs $< 1.5$ )                                  | 5.03 (1.16-34.97)                         | 0.05                                       | 4.30 (0.87-32.32)                            | 0.10                                         |
| Regorafenib dose ( $\leq 80$ mg vs $> 80$ mg)                           | 2.14 (0.72-6.86)                          | 0.18                                       | 2.04 (0.62-7.18)                             | 0.25                                         |

|               |                   |      |                   |      |
|---------------|-------------------|------|-------------------|------|
| Type of ICIs  |                   |      |                   |      |
| Nivolumab     | Reference         | -    | Reference         | -    |
| Pembrolizumab | 1.43 (0.21-9.89)  | 0.71 | 1.28 (0.17-9.81)  | 0.81 |
| Sintilimab    | 1.34 (0.41-4.52)  | 0.62 | 1.11 (0.30-4.24)  | 0.87 |
| Camrelizumab  | 1.71 (0.37-8.29)  | 0.49 | 1.39 (0.20-10.22) | 0.74 |
| Toripalimab   | 2.86 (0.64-14.52) | 0.18 | 3.91 (0.70-26.62) | 0.13 |
| Tislelizumab  | 0.71 (0.03-8.97)  | 0.80 | 0.37 (0.01-5.39)  | 0.48 |

a. The multivariate analysis was performed adjusting for the age ( $\geq 70$ ), ECOG ( $\geq 1$ ), KRAS/NRAS mutation status and site of primary tumor (left) according to the KEYNOTE-177 study.

**Abbreviations:** CI, confidence interval; ECOG PS, Eastern Cooperative Oncology Group Performance Status; EGFR, epidermal growth factor receptor; ICI, immune checkpoint inhibitor; NLR, neutrophil-lymphocyte ratio; OR, odds ratio; VEGF, vascular endothelial growth factor

**Supplementary Table 3 Univariate and multivariate analysis for progression-free survival <sup>a</sup>**

| <b>Variables</b>                                                        | <b>Univariate analysis HR<br/>(95%CI)</b> | <b>P value for<br/>univariate<br/>analysis</b> | <b>Multivariate analysis HR<br/>(95% CI)</b> | <b>P value for<br/>multivariate<br/>analysis</b> | <b>P value for PH<br/>assumption</b> |
|-------------------------------------------------------------------------|-------------------------------------------|------------------------------------------------|----------------------------------------------|--------------------------------------------------|--------------------------------------|
| Age ( $\geq 70$ vs $< 70$ )                                             | 1.54 (0.84-2.82)                          | 0.16                                           | -                                            | -                                                | 0.93                                 |
| ECOG PS ( $\geq 1$ vs 0)                                                | 1.08 (0.60-1.94)                          | 0.80                                           | -                                            | -                                                | 0.37                                 |
| Site of primary tumor (left vs right)                                   | 1.06 (0.58-1.94)                          | 0.84                                           | -                                            | -                                                | 0.69                                 |
| Synchronous metastases (yes vs no)                                      | 0.81 (0.48-1.35)                          | 0.41                                           | 0.93 (0.51-1.68)                             | 0.80                                             | 0.62                                 |
| Metastatic sites ( $\geq 4$ vs $< 4$ )                                  | 2.76 (1.38-5.52)                          | 0.004                                          | 1.35 (1.05-1.73)                             | 0.02                                             | 0.4                                  |
| Lung metastases (yes vs no)                                             | 0.91 (0.54-1.52)                          | 0.71                                           | 1.18 (0.67-2.07)                             | 0.57                                             | 0.53                                 |
| Liver metastases (yes vs no)                                            | 1.70 (0.97-2.97)                          | 0.06                                           | 1.98 (1.07-3.69)                             | 0.03                                             | 0.92                                 |
| BRAF, KRAS or NRAS mutation (yes vs no)                                 | 0.78 (0.45-1.34)                          | 0.36                                           | -                                            | -                                                | 0.83                                 |
| KRAS or NRAS mutation (yes vs no)                                       | 0.79 (0.46-1.35)                          | 0.39                                           | -                                            | -                                                | 0.8                                  |
| BRAF mutation (yes vs no)                                               | 1.86 (0.25-13.83)                         | 0.54                                           | 2.37 (0.31-18.19)                            | 0.41                                             | 0.08                                 |
| Previous treatment lines ( $\geq 3$ vs $< 3$ )                          | 1.13 (0.66-1.94)                          | 0.66                                           | 1.04 (0.58-1.86)                             | 0.89                                             | 0.79                                 |
| Previous regorafenib (yes vs no)                                        | 1.19 (0.69-2.04)                          | 0.52                                           | 1.27 (0.65-2.45)                             | 0.48                                             | 0.43                                 |
| Previous ICIs (yes vs no)                                               | 1.58 (0.38-6.54)                          | 0.53                                           | 1.33 (0.31-5.69)                             | 0.7                                              | 0.09                                 |
| Previous anti-VEGF treatment (yes vs no)                                | 0.93 (0.44-1.97)                          | 0.85                                           | 1.05 (0.48-2.26)                             | 0.91                                             | 0.95                                 |
| Previous anti-EGFR treatment (yes vs no)                                | 1.27 (0.71-2.28)                          | 0.42                                           | 1.20 (0.55-2.65)                             | 0.65                                             | 0.53                                 |
| Time to study treatment initiation ( $\geq 18$ months vs $< 18$ months) | 1.30 (0.77-2.17)                          | 0.32                                           | 1.23 (0.70-2.18)                             | 0.47                                             | 0.82                                 |
| Baseline NLR ( $\geq 1.5$ vs $< 1.5$ )                                  | 3.43 (1.24-9.54)                          | 0.02                                           | 2.83 (1.00-7.98)                             | 0.05                                             | 0.44                                 |

|                                                           |                  |      |                  |      |      |
|-----------------------------------------------------------|------------------|------|------------------|------|------|
| Regorafenib dose ( $\leq 80\text{mg}$ vs $>80\text{mg}$ ) | 1.17 (0.62-2.21) | 0.63 | 1.05 (0.52-2.14) | 0.89 | 0.4  |
| Type of ICIs                                              |                  |      |                  |      | 0.09 |
| Nivolumab                                                 | Reference        | -    | Reference        | -    |      |
| Pembrolizumab                                             | 2.86 (0.96-8.50) | 0.06 | 2.78 (0.88-8.78) | 0.08 |      |
| Sintilimab                                                | 1.46 (0.70-3.04) | 0.32 | 1.05 (0.47-2.37) | 0.9  |      |
| Camrelizumab                                              | 1.17 (0.47-2.93) | 0.73 | 0.85 (0.26-2.78) | 0.78 |      |
| Toripalimab                                               | 2.36 (0.98-5.68) | 0.05 | 1.94 (0.75-5.02) | 0.17 |      |
| Tislelizumab                                              | 1.84 (0.50-6.76) | 0.36 | 1.48 (0.37-5.87) | 0.58 |      |

a. The multivariate analysis was performed adjusting for the age ( $\geq 70$ ), ECOG ( $\geq 1$ ), KRAS/NRAS mutation status and site of primary tumor (left) according to the KEYNOTE-177 study.

**Abbreviations:** CI, confidence interval; ECOG PS, Eastern Cooperative Oncology Group Performance Status; EGFR, epidermal growth factor receptor; ICI, immune checkpoint inhibitor; HR, hazard ratio; NLR, neutrophil-lymphocyte ratio; PH, proportional hazard; VEGF, vascular endothelial growth factor
